# Supplementary material for: The Effect of stemcell treatment on nephrotoxicity developing after cyclophosphamide treatment
Source: Research Square preprint supplement (doi:10.21203/rs.3.rs-7124194/v1), 2025-09-23
Supplement: Supplementary file 1 [file 4bcb1c3a9fc3e275ee055e32.docx]

Table 2: Comparative analysis of histopathological variables according to groups

| **Variables** | **Control,** | **CTX,** | **CTX + Stem Cell,** | **p-value** |
| --- | --- | --- | --- | --- |
| **N = 6** | **N = 6** | **N = 5** |
| Glomerulsclerosis |  |  |  | <0.001 |
| 0 | 3 (60%) | 0 (0%) | 0 (0%) |  |
| 1 | 2 (40%) | 0 (0%) | 5 (100%) |  |
| 2 | 0 (0%) | 4 (80%) | 0 (0%) |  |
| 3 | 0 (0%) | 1 (20%) | 0 (0%) |  |
| Tubular atrophy |  |  |  | 0.010 |
| 0 | 2 (40%) | 0 (0%) | 0 (0%) |  |
| 1 | 3 (60%) | 0 (0%) | 4 (80%) |  |
| 2 | 0 (0%) | 3 (60%) | 1 (20%) |  |
| 3 | 0 (0%) | 2 (40%) | 0 (0%) |  |
| Inflammation |  |  |  | 0.068 |
| 0 | 3 (60%) | 0 (0%) | 4 (80%) |  |
| 1 | 2 (40%) | 5 (100%) | 1 (20%) |  |
