# Supplementary material for: The Effect of stemcell treatment on nephrotoxicity developing after cyclophosphamide treatment
Source: Research Square preprint supplement (doi:10.21203/rs.3.rs-7124194/v1), 2025-09-23
Supplement: Supplementary file 2 [file bcd00d4612a03f0e288eb847.docx]

Table 1: Comparison of biochemical parameters between groups

| **Variables** | **Control** | **CTX** | **CTX + Stem Cell** | **p-value** |
| --- | --- | --- | --- | --- |
| **N = 6** | **N = 6** | **N = 5** |
| Creatinine |  |  |  | 0.8 |
| Mean (SD) | 0.39 (0.03) | 0.39 (0.07) | 0.39 (0.07) |  |
| Median (IQR) | 0.40 (0.39, 0.40) | 0.37 (0.34, 0.46) | 0.37 (0.34, 0.42) |  |
| Range | 0.34, 0.42 | 0.31, 0.48 | 0.32, 0.49 |  |
| Blood urea nitrogen (mg/dL) |  |  |  | 0.141 |
| Mean (SD) | 26.3 (2.2) | 23.3 (2.9) | 23.8 (2.6) |  |
| Median (IQR) | 26.0 (25.0, 27.0) | 23.5 (23.0, 25.5) | 23.0 (22.0, 26.0) |  |
| Range | 24.0, 30.0 | 18.0, 26.0 | 21.0, 27.0 |  |
| Blood urea level (mg/dL) |  |  |  | 0.8 |
| Mean (SD) | 51.9 (1.2) | 51.6 (7.3) | 50.9 (5.5) |  |
| Median (IQR) | 51.2 (51.0, 53.0) | 53.5 (49.8, 55.6) | 49.2 (47.1, 55.6) |  |
| Range | 51.0, 53.5 | 38.5, 59.2 | 44.9, 57.8 |  |
